# Supplementary material for: Parental socioeconomic position and midlife allostatic load: a study of potential mediators
Source: Springer Nature journal article supplement (doi:10.1186/s12889-018-5956-x), 2018-08-20

**Additional file 1. Figure S1.** Overview of data collection.

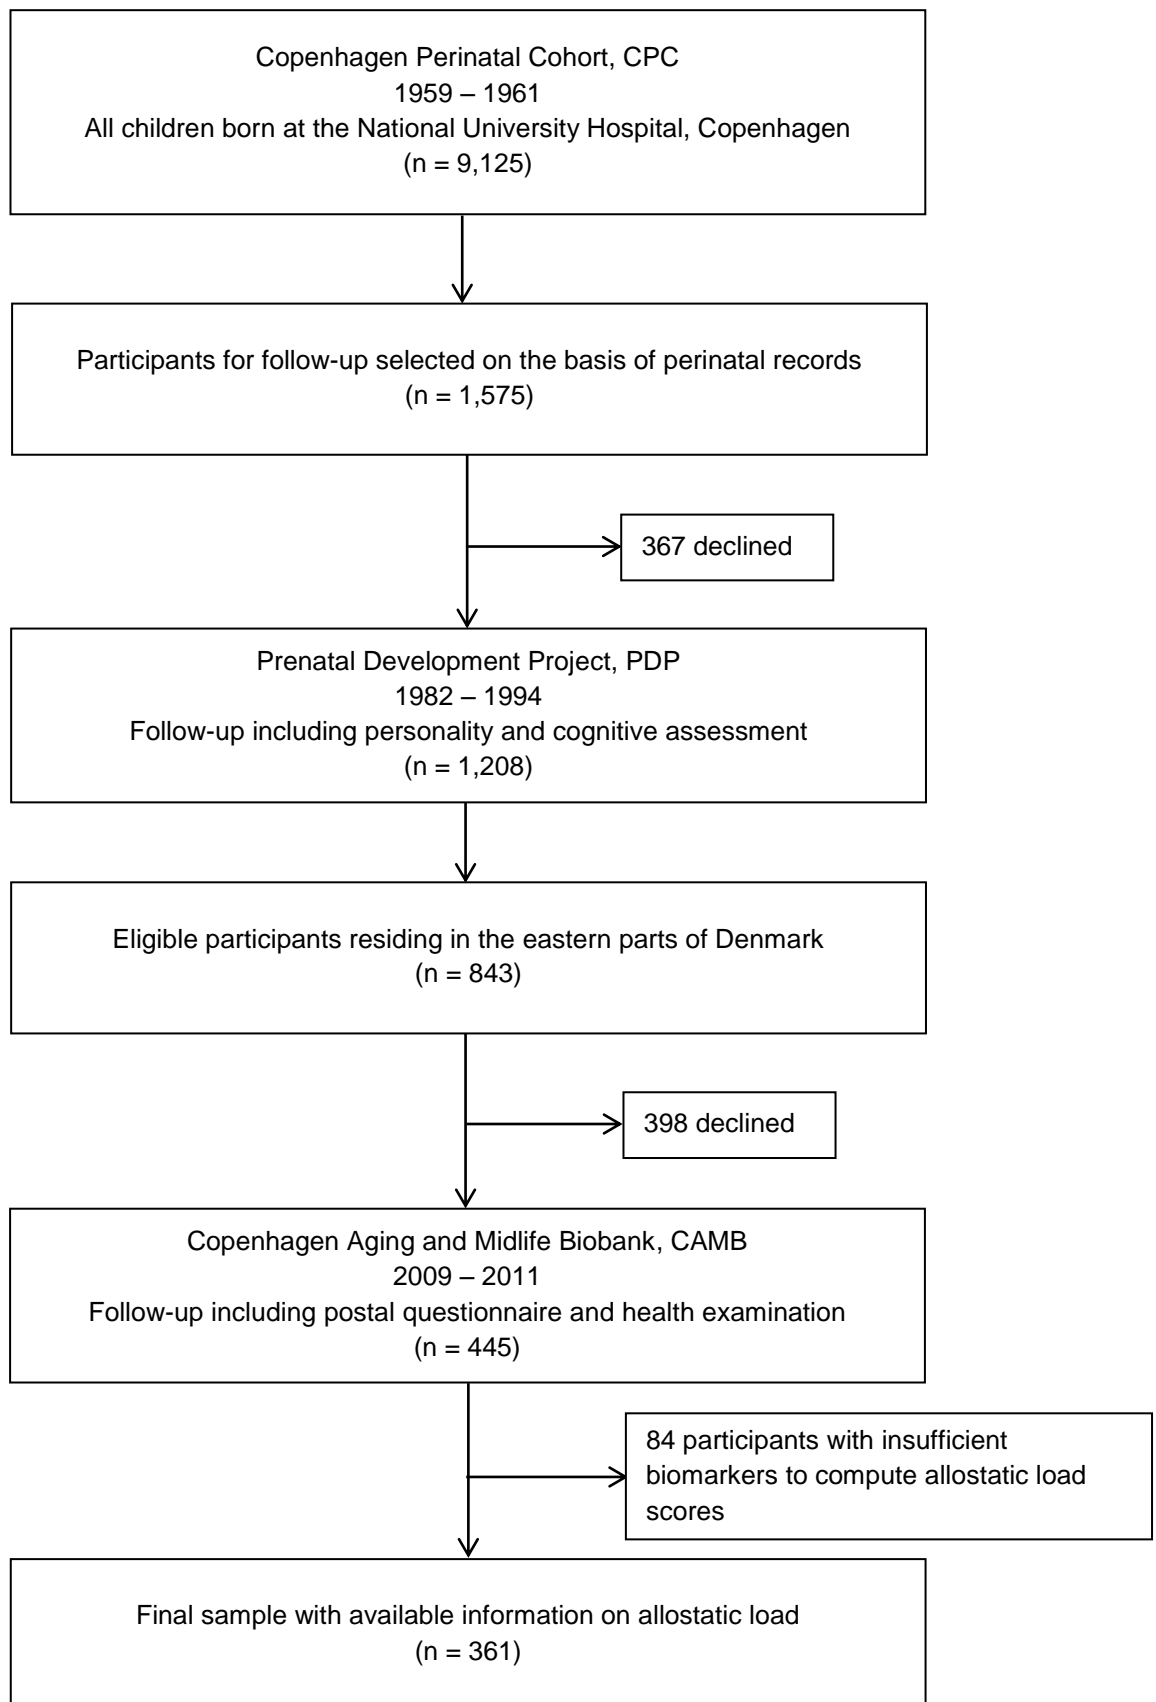

Supplement: MOESM1 [file 16057980]
